# Supplementary material for: Point-of-care C-reactive protein measurement by community health workers safely reduces antimicrobial use among children with respiratory illness in rural Uganda: A stepped wedge cluster randomized trial
Source: PubMed Central journal article supplement (PMC11407643; doi:10.1371/journal.pmed.1004416), 2024-08-19
Supplement: pmed.1004416.s002.pdf [file pmed.1004416.s002.pdf]

# Figure S1. STAR STUDY SICK CHILD JOB AID FOR INTERVENTION PERIODS

## 1a. ASK THE CARE GIVER / BULHAYA OYULYALETHA OMWANA

How Old Is The Child?  
Omwana awithe emyaka mingahi?



2-11 months / emighesera

1-2 years / emyaka

3-5 years / emyaka

**1b. -IF LESS THAN 2 MONTHS, THEY ARE NOT ELIGIBLE FOR THE STAR STUDY**  
**Abana abali ahisi syemighesera ibiri sibendi yiyunga okwamusomo ono**  
**- IF NO CARE GIVER, THEY ARE NOT ELIGIBLE FOR THE STAR STUDY**  
**Amathendyasa noyulyamuletha isyendi yiyunga okwamusomo ono**



If either of the above things are true, switch to routine sick child job aid  
If care giver present and child is 2 months or older, continue with star study Sick Child Job Aid

**Ebiri ahaghuhu Byamabya Ibinahikire, Suba Okwandaghiro Eyabulikiro Eyabayonzesya.**  
**Amasa n'owakamulhabirira kandi Omwana inyanawithe amezi abiri nerilolha Eyighulhu**  
**Ghende Embere nendaghiro Eyomusomo Owe Star Study**

## 2a. ASK CHILD'S PROBLEMS / BULHAYA EBITSIBU EBYOMWANA AWITHE

Does the child have cough, diarrhea and fever  
Omwana anemukoholha, erihurungana, kwitse erihuhanako omubiri?



If diarrhea, cough or fever only, they are not eligible for the STAR study  
→switch to routine Sick Child Job Aid

omwana owalwere erihurungana lisa, erikoholha lisa kwitse erihuhanako omubiri lisa akabya isatholere eriyiyunga okwamusomo ono

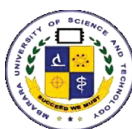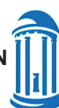

## 2b. ASK CHILD'S PROBLEMS / BULHAYA EBITSIBU EBYOMWANA AWITHE

If cough and fever for 7 days or less, approach care giver about consenting for the study.  
Amasagwa inyawithe ekikuba nerihuhana ahabwe biro musanju kwihi bike kanaya noyulyamuletha okwamwatsi weriyiyunga okwa musomo.

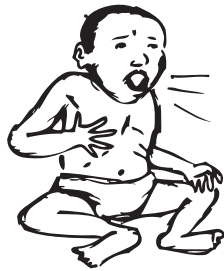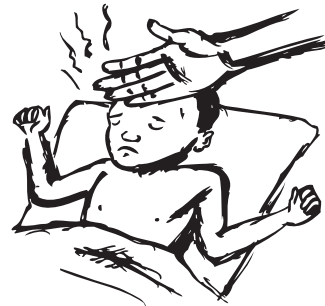

If they do not consent or if they have symptoms for more than 7 days  
→ switch to routine Sick Child Job Aid

Amaghana kwitsi omwana amasangwa inawithe obuminyikalho erilhaba okwabiyo musanju, ghenda okwa ndayiyiro eyabayonzesya

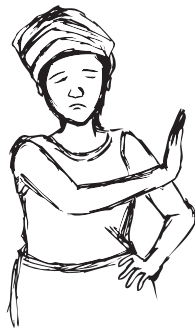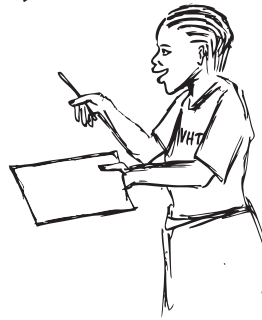

If consented start a data collection form AND perform an MRDT and CRP test  
Amikirirya eriyiyunga okwamusomo handika ebihambire okwamwana neryo ghumupime omutsutsa ne kipimo ekye CRP

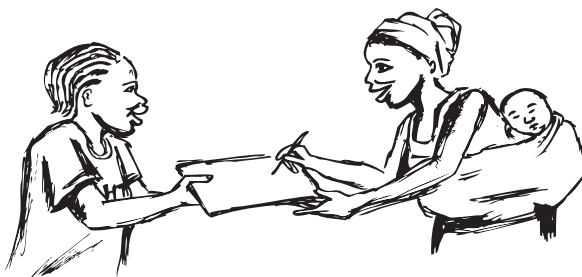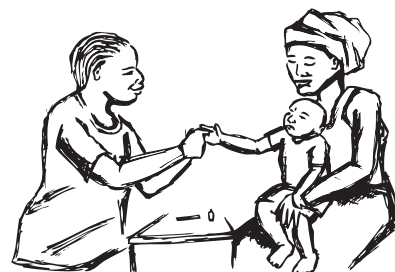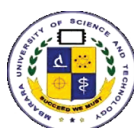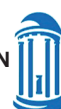

Check for fast breathing and temperature (also heart rate and oxygen saturation if the VHT has a pulse oximeter)

Kebera erihumulha lyo mwana no buhuhane (hayima neri swirya lyo mutima no muka omuyonzesya amasangwa inyana withe ebyeripimamu)

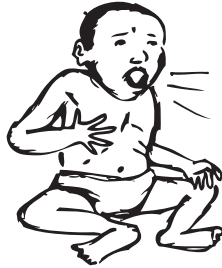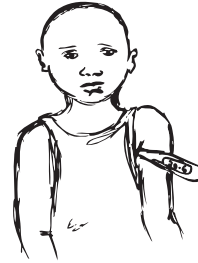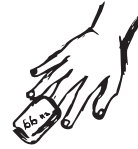

**3. ASK AND LOOK FOR DANGER SIGNS AND REFER/ BULHAYA KANDI USAMALIRE OMWANA NGANEKO EBISOSEKANO EBYERITHOHA NERYO IWAMUTHUMA OKWITHAMBIRO**

a. If vomiting everything, severe chest in-drawing, convulsions, not able to drink or breastfeed, very sleepy, uncounscious, difficult to wake → give a referral treatment( same as section 4a on the usual sick child job aid) and refer to health facility

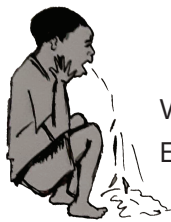

Vomits everything  
Erisala Obulikalyo kosi

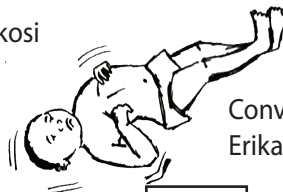

Convulsions  
Erikangabalha

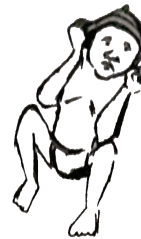

Chest in-drawing  
Ekikuba ekyo mwana  
Erisuba Omwakathi  
kutsibu Akahumulha

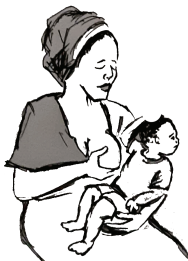

Not able to breastfeed or Drink  
mwana erighana eryonga  
jtsi Erinywa

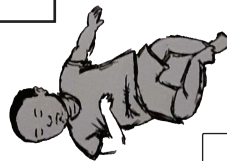

Very sleepy or uncounscious/  
Difficult to wake.  
Omwana erisiba Omwathulho  
kutsi Erithoha

**OTHER DANGER SIGNS(EBINDI EBIMINYIKALO EBYERI THOHA)**

1. O2 sat <90 % (erihumulha ahisi okwa mirundi kyenda)

2. Very fast breathing(RR>70 breaths per minute for age 2-11 months

and RR>50 for age 1-5 years) Erihumulha lhuba lhuba emirundi eyilhabire okwa sanju okwa baana abali ahakathikathi ke mighesera ibiri erihika okwikumi nalignuma, kandi emirundi eyilhabire okwa makumi athanu okwa bana abali ahakathikathi yo mwaka mughuma eri hika okwi thanu)

3. Malnutrition(MUAC 11.5 cm or red) Eryuse

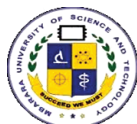

MUST-UNC RESEARCH COLLABORATION

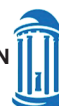

THE UNIVERSITY  
of NORTH CAROLINA  
at CHAPEL HILL

**4. IF NO DANGER SIGNS, TREAT AND ADVISE - HAMATHENDIBYA EBISOSEKANO EBYERITHOHA JANJABA KANDI GHUHABULHE**



a. If MRDT Positive - Oral anti malarial ACT if  $\geq 4$  months of age  
Omuthutsa amabanikamo amabya inyanawithe emighesera ikumi nerilholha eyighulu ghumhereraye omubatsi

- Give 1 dose twice daily for 3 days. Hereraya ekinini kighuma kabiri ekiro habwe biro bisathu 4 months to 3 years (emighesera ini erihika okwa myaka isathu) 1 tab from **YELLOW PACK** -ekinini kighuma erilwa omwakabokisi akekisande
- 3-5 years 2 tabs from **BLUE PACK** / Emyaka isyathu eri hika okwithanu ebinini bibirti omwa ksbokisi akebulu
- Help care giver give first dose now -Ghuwathikaye owalyaletha omwana erishererya edozi eyokubanza hatya hatya
- Advise care giver on use of bednet - Ghuhabulhe Oyulyaletha Omwana Okwikolesya Akatimba kemibu

**b. IF CRP  $\geq 40$  (EITHER MRDT POSITIVE OR MRDT NEGATIVE) GIVE AMOXICILLIN - EKIBIMO KYAMAKANGANIA KITHI KIRI OMWA MAKUMI ANI NERILOLHA EYIGHULHU(OMUTSUTSA NOMU ANGABYAMO KUSTI ESYALIMO)GHUMUHE AMOXICILLIN**

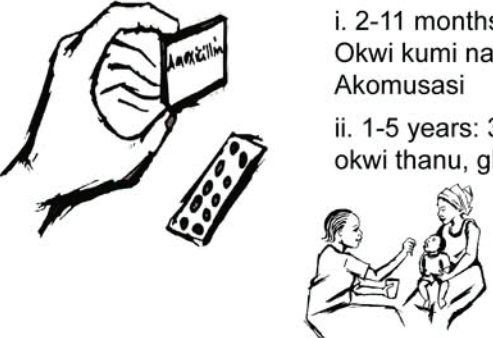

- 2-11 months: 2 tabs from red pack - Emighesera ibiri erihika Okwi kumi na mughuma ghubahe ebijuma bibiri ebiri Omwa kapaketi Akomusasi
- 1-5 years: 3 tabs from green pack - Omwaka mughuma erihika okwi thanu, ghubahe ebijuma bisathu ebiri omwa kapaketi ake kibabi.
- Help care giver give first dose now  
Ghuwathikaye Owalyaletha Omwana Erihererya edozi eyokubanza hathya hathya

**c. If CRP is  $<40$ (either MRDT Positive or MRDT Negative) give advise for all children treated at home(same as section 5) only**  
Ekipimo Kyamakangania Kithi Kiri Omwa Makumi Ani Nerilolha ahisi Omutsutsa Nomu Angabyamo Kusti Esyalimo) ghuhereraye erihabulha okwabana abakajanjabirawa Eka (Ngoku kinakanganibwe omwa kaseseka akakathanu) Kisa



- Make a plan for follow up of the child in 7 days  
Ghukole endegheka eyerikwamira Omwana ahanyuma yebiro musanju

NOTE: all children age 2 to 4 months with fever should be referred regardless of mRDT result as per iCCM-abana abali ahakathiklathi ke mighesera ibiri erihika okwini,batholere iba lebekwa okwa sipatara omutsutsa amabanika mo kutse nomwanga thendibanikamo
